# Supplementary material for: An Additive Effect of Promoting Thermogenic Gene Expression in Mice Adipose-Derived Stromal Vascular Cells by Combination of Rosiglitazone and CL316,243
Source: MDPI journal article supplement (doi:10.3390/ijms18051002), 2017-05-08
Supplement: s1 [file s1]

**Table S1:** Primers used for qPCR.

| Gene                                   | Forward primer (5' - 3') | Reverse primer (5' - 3')  |
|----------------------------------------|--------------------------|---------------------------|
| <b>common adipocyte genes</b>          |                          |                           |
| <i>AdipoQ</i>                          | GCACTGGCAAGTTCTACTGCAA   | GTAGGTGAAGAGAACGGCCTTGT   |
| <i>Ppar<math>\gamma</math></i>         | GTGCCAGTTTCGATCCGTAGA    | GGCCAGCATCGTGTAGATGA      |
| <i>Fabp4</i>                           | ACACCGAGATTTCTTCAAACCTG  | CCATCTAGGGTTATGATGCTCTTCA |
| <b>thermogenic genes</b>               |                          |                           |
| <i>Prdm16</i>                          | CAGCACGGTGAAGCCATTC      | GCGTGCATCCGCTTGTG         |
| <i>Ebf2</i>                            | GCTGCGGGAACCGGAACGAGA    | ACACGACCTGGAACCGCCTCA     |
| <i>Cidea</i>                           | TGCTCTTCTGTATCGCCCAGT    | GCCGTGTTAAGGAATCTGCTG     |
| <i>Pgc1<math>\alpha</math></i>         | CCCTGCCATTGTTAAGACC      | TGCTGCTGTTCTGTGTTTC       |
| <i>Ucp1</i>                            | ACTGCCACACCTCCAGTCATT    | CTTTGCCTCACTCAGGATTGG     |
| <i>Dio2</i>                            | CAGTGTGGTGACGTCTCCAATC   | TGAACCAAAGTTGACCACCAG     |
| <i>Cox5b</i>                           | GCTGCATCTGTGAAGAGGACAAC  | CAGCTTGTAATGGGTTCCACAGT   |
| <i>Cox7a1</i>                          | CAGCGTCATGGTCAGTCTGT     | AGAAAACCGTGTGGCAGAGA      |
| <i>Cox8b</i>                           | GAACCATGAAGCCAACGACT     | GCGAAGTTCACAGTGGTTCC      |
| <i>Cyts</i>                            | GCAAGCATAAGACTGGACCAAA   | TTGTTGGCATCTGTGTAAGAGAATC |
| <b>beige adipocyte selective genes</b> |                          |                           |
| <i>CD137</i>                           | CGTGCAGAACTCCTGTGATAAC   | GTCCACCTATGCTGGAGAAGG     |
| <i>Tmem26</i>                          | ACCCTGTCATCCCACAGAG      | TGTTTGGTGGAGTCCTAAGGTC    |
| <b>white-selective genes</b>           |                          |                           |
| <i>Retn</i>                            | CTGTCCAGTCTATCCTTGACAC   | CAGAAGGCACAGCAGTCTTGA     |
| <i>Leptin</i>                          | GAGACCCCTGTGTCGGTTC      | CTGCGTGTGTGAAATGTCATTG    |
| <b>reference gene</b>                  |                          |                           |
| <i><math>\beta</math>-actin</i>        | CGTGAAAAGATGACCCAGATCA   | CACAGCCTGGATGGCTACGT      |
